# Supplementary material
Source: publisher figshare collection journal article supplement (https://tandf.figshare.com/articles/dataset/_/1632804)
Supplement: Supplementary file 1 [file 1]

**Appendix 2**

**Characteristics of included studies (traumatic cause)**

| Reference  First author  Year of publication Geographic location | Design  Pa  Rb | Population  N: number of subjects  G: gender M/Fc  A: age mean, SDd, range  I: injury | Follow-up | Loss to follow-up | Prognostic factors | Non prognostic factors (not significant) | Outcome |
| --- | --- | --- | --- | --- | --- | --- | --- |
| Andelic  2012  Norway | P | N: 147 fulfilled inclusion criteria  N: 93 sample  G: 71/22  A: 31.0, 11.2  I: moderate-severe TBIe | 1 year | N: 27 refused participation  N: 23 died  N: 4 dropped out | ORf, 95% CIg  CTh Marshall score ≥3  0.26, 0.07-1.00  FIM-COGi limitations  0.18, 0.04-0.96  Pre-injury employment  0.05, 0.01-0.27 | Associated injuries  FIM-Mj  CIQk  Age  Gender | Employment (working full-time or part-time vs. unemployed) |
| Arango-Lasprilla  2008  United States | R | N: 5259  N: 3636 analyzed  G: 3884/1374  whites  A: 38.8, 18.2  minorities  A: 36.1, 15.3  I: moderate-severe TBI | 1 year | N: 1623 | Wald χ2, adjusted p  DRSl discharge  203.49, <0.001  Age  16.62, <0.001  Education low level  45.66, <0.001  Unmarried  19.15, <0.001  Minority  58.23, <0.001 | Cause  Gender Employment pre-injury | Employment status (competitively employed vs. unemployed) |
| Avesani  2005  Italy | R | N: 438 population  N: 353 remained  G: 275/78  A: 27.7, 18-68 RTWm  A: 29.7, 18-68  No RTW  I: severe TBI | 2-10 years | N: 85 | p  Higher GCSn  7.2 vs. 6.0  0.00  Shorter PTAo  49.4 vs. 111.4 gg  0.00  Shorter LOSp  45.6 vs. 117.3  0.00  Lower GOS-Eq   - 1. vs. 2.6   0.00 | Age  Education | Reemployment |
| Brown  2010  United States | R | N: 7050 total  N: 5250 sample  G: 73.6/6.4%  A: 37.8  I: TBI | 1 year | N: 1800 no data | Shorter PTA  < 4 weeks |  | Employment status competitively employed vs other) |
| Esbjörnsson 2013  Sweden | P | N: 16  N: 15 employed pre-injury  G: 9/7  A: 37.3, 15.1, 20-62  I: TBI | 1 year | N: 0 | p  GCS  0.00  Acute phase testability (GCS=14)  0.00  BNISr attention/concentration  0.02 | BNIStotal | RTW |
| Franulic  2004  Chile | R | At 2 years  N: 70  A 37.3 RTW  A: 40.9 no RTW  At 5 years  N: 72  A: 40.5 RTW  A: 43.4 no RTW  At 10 years  N: 58  A: 36.3 RTW  A: 39.3 no RTW  I: mild-severe TBI | 2, 5 and 10 years | N: 2 | P  Hamilton scale depression/anxiety  Less symptoms of  Depression 5 years post injury  Anxiety 10 years post injury  <0.05  NRS-Rs metacognition  2, 5, 10 years post injury  NRS-R cognitive  2, 5, 10 years post injury  NRS-R emotional control  5 years post injury  <0.05 | Symptoms of  Depression  2, 10 years  Anxiety  2, 5 years  NRS-R affectivity  2, 5, 10 years  NRSR emotional control  2, 10 years | Employment status |
| Fraser  2006  USA | P | N: 156  N: 140 successfully followed  G: 118/22  A: 35  I: mild-severe TBI | 1 month, 6 months, 1 year, 3-5 years | N: 16 | p  Time to follow commands  (GCS motor=6)  0.00  Memory SRTt  0.00  Cognitive efficiency WAISu  0.00  Gender  0.04  Alcohol abuse  0.02 | GCS  Age  Education  Reasoning skills  Specific vocational preparation Occupation (DOTv)  Job stability  Income  Drug abuse Arrested anytime | RTWhalf time or more at 3-5 years/ RTW but not sustained at 3-5 years/no RTW |
| Gary  2009  United States | R | N: 2022  G: 1526/496  A: 34.1, 11.6  I: TBI | 1, 2, 5 years | N: 373 | OR, 95% CI  LOS acute  1.80, 1.55-2.09  LOS rehabilitation  1.27, 1.11-1.46  Cause violent  1.45, 1.09-1.94  DRS admission  1.43, 1.15-1.77  DRS discharge  1.51, 1.33-1.72  Older age  T1: 1.60, 1.29-1.97  T2: 2.03, 1.63-2.53  T3: 3.40, 2.67-4.32  Female sex  1.26, 1.01-1.57  Education low level  2.34, 1.86-2.94  Pre-injury employment 3.39, 2.65-4.32  Unmarried  1.39, 1.11-1.74  Minority  T1: 2.61, 1.93-3.53  T2: 2.10, 1.56-2.83  T3: 3.15, 2.30-4.30 |  | Employment status (not competitively vs competitively paid employment full-time or part-time) |
| Grauwmeijer 2012  Netherlands | P | N: 113  G: 82/31  A: 33.2, 13.1  I: moderate-severe TBI | 3, 6, 12, 18, 24, 36 months | N: 19 | Adjusted OR, p  Psychiatric symptoms  10.6, <0.019  Cognitive FAMw  0.92, <0.002 | LOS hospital  Discharge destination  ADLx BIy  FIMz  GOSaa  Age | Employment status |
| Ketchum  2012  United States | R | N: 593  N: 418 no missing data  G: 337/81  A: 29.6, 10.2  I: TBI | 1 year | N: 175 | Adjusted OR, 95% CI  PTA  still vs. <2 wks  4.88, 1.53-15.60  still vs. 2-4 wks  4.45, 1.46-13.57  ≥4 wks vs. <2 wks  3.21, 1.37-7.54  ≥4 wks vs. 2-4 wks  2.92, 1.36-6.30  LOS rehabilitation  1.25, 1.06-1.47  Cause violent  3.99, 1.60-9.94  Cause fall  2.59, 1.15-5.86  Associated spinal cord injury  7.17, 1.81-28.50  FIM-M discharge  1.18, 1.04-1.33  Education low level  8th grade or less  2.54, 1.09-5.94  9th-11th grade  3.04, 1.37-6.74  Pre-injury employment  2.85, 1.29-6.31 | GCS  LOS acute  DRS  FIM-COG | Competitive employment status |
| Nakase- Richardson  2007  United States | P | N: 191 qualified participants  N: 171 study participants  G: 120/51  A: 16-?  I: mild-severe TBI | 1 year (10-14 months) | N: 20 | IQRab, 95% CI, p  Confusion  DelRS-R98ac  0.35, 0.14-0.87, 0.02  Age  0.33, 0.15-0.73, 0.01  Education high level  2.48, 1.47-4.19, 0.00 | GCS  PTA | Employment |
| Stulemeijer  2007  Netherlands | P | N: 453 total cohort  N: 201  G: 123/78  A: 35.6, 12.3  I: mild TBI | 6 months | N: 252 | OR, 95% CI  No nausea/vomiting  5.1, 1.8-14.3  No extracranial injuries  3.4, 1.6-7.3  Education high level  6.4, 2.3-18.3 | GCS  LOCad  PTA  CT  Cause Comorbidities  Prior head injury  Age  Gender | Full RTW (not on sick leave or no change in working status because of the accident) |
| Walker  2006  United States | R | N: 1926 potential participants  N: 1341 follow-up data available  G: 1033/308  A: 35.0, 18-62  I: mild-severe TBI | 1 year | N: 585 | Adjusted OR, p  Referenced 75%vs. 25%  LOS  0.42, <0.05  Independence FIM  2.38, <0.05  Age  0.58, <0.05  Female  1.42, <0.05  Education high level  2.32, <0.05  Pre-injury occupation Professional/managerial 3.16, <0.05  Skilled  1.71, <0.05  Married  1.52, <0.05 | Unconsciousness | RTW (competitively employed) |

**Characteristics of included studies (non-traumatic cause)**

| Reference  First author Year of publication Geographic location | Design  P  R  PCae | Population  N: number of subjects  G: gender M/F  A: age mean, SD, range  I: injury | Follow up | Loss to follow up | Prognostic factors | Non prognostic factors (not significant) | Outcome |
| --- | --- | --- | --- | --- | --- | --- | --- |
| Busch  2009  England | R | N: 400 working before stroke  N: 266 follow-up data available  G: 261/139  A: 53.8, 12.9  I: First stroke | 1 year | N: 134 | OR, 95% CI  Diabetes Mellitus  0.25, 0.08-0.79    ADL BI  0.24, 0.11-0.49  Age  55-64 years  0.14, 0.05-0.42, ≥65 years  0.23, 0.07-0.76  Female sex  0.43, 0.21-0.91  Minority  0.41, 0.19-0.88 | GCS | Return to paid work |
| Doucet  2012  France | R | N: 72 included  N: 56 responded  G: 35/21  A: 48.3, 10.1  I: Stroke  Ischemic N: 28  Hemorrhagic N: 20  Cerebromeningeal hemorrhage N: 8 | 3 years | N: 16 | p  Language disorders  0.02  ADL BI  0.00  Disability mRSaf  0.00  Resumption of driving  0.00  Professional support  0.00  Discussed by staff and occupational physician  0.01  Living with a partner  0.01 | LOS rehabilitation  Stroke type/location Epilepsy  Disorders  motor, sensory, cognitive, visual Age  Gender  Education  Occupation pre-injury  Company size  Time  in work/with employer Handicapped worker | RTW (vs. no RTW: invalidity, retirement, training, retraining) |
| Glozier  2008  New Zealand | P | N: 210  G: 144/66  A: 55  I: Stroke | 6 months | N: 55 | OR, 95% CI  Psychotropic medication/ treatment depression)  0.39, 0.18-0.81  Dependent  ADL BI  0.28, 0.13-0.59  Pre-injury part-time job  0.6, 0.15-0.89  Minority  0.40, 0.17-0.91 | Diabetes Mellitus  Age  Gender | RTW (return to paid work) |
| Hackett  2012  Australia | P | N: 441 recruited  N: 416 remained  N: 271 study group (working pre-injury)  G: 196/75  A: 50.7, 10.1 RTW  A: 52.9, 9.3 no RTW  I: Stroke | 28 days, 6 months, 1 year | N: 25 | OR, 95% CI  No illness restricting activity before stroke  Male  6.40, 1.46-28.03  Female  5.89, 1.21-28.70  Independent  ADL FAIag  10.23, 4.11-25.6  Age  0.94, 0.90-0.98  No health insurance  0.40, 0.18-0.89 | No depression  No history of depression  No other comorbidity  Gender  Education low level | RTW (full-time or part-time paid work-same/different job) |
| Hannerz  2012  Denmark | P | N: 13178  N: 12106 in analysis  G: 60.4%/39.6%  A: 47.6, 21-57  I: Stroke (hemorrhage/ infarction/ not specified) | 2 years | N: 1072 | OR, 95% CI  Enterprise size (employees)  Micro (1-9)  0.83, 0.73-0.95  Small (10-49)  0.87, 0.77-0.98 | Enterprise size (employees)  Medium (50-249) | Gainful occupation  (1=self employed/assisting spouse/employee, 0=unemployed/not economically active/dead) |
| Kauranen  2013  Finland | PC | Patients  N: 161 fulfilled inclusion criteria  N: 140 study population  G: 83/57  A: 52.0, 10.5  I: First ischemic stroke  Controls  N: 50  G: 31/19  A: 54.3, 9.0 | 6 months | N: 21 | Wald, OR, 95% CI, p  Number of cognitive deficits  8.240, 2.25, 1.29-3.92, 0.004 | GCS  NIHSSah  Etiology (TOASTai)  Persistent cognitive deficits  ADL BI  Age  Education high level  Occupation pre-injury | Inability to return to work (not returning to paid employment outside the house either full-time or part-time) |
| Mailles  2012  France | P | N: 205 eligible patients  N: 176 included  N: 63 employed  G: ratio M/F 1.6  A: 53.5, 1mo-89y  I: Encephalitis | 3 years | N: 29 | p  Resumption leisure activities  0.00  Education high level  0.00 |  | RTW |
| Palmcrantz 2012  Sweden | R | N: 232 included  N: 158 returned questionnaire  G: 104/54  A: 59, 32-64  I: Stroke  Infarction N: 126  Hemorrhage N: 28  Not specified N: 4 | Up to 7 years | N: 74 | OR, 95% CI  SSSaj  3.91, 1.46-10.46  Education low level  2.69, 1.19-6.08  Living alone  2.30, 1.04-5.10 |  | Limitations/restrictions in returning to work |
| Saeki  2004  Japan | R | N: 126  G: 99/27  A: 54, 18-64  I: First stroke | Mean 1418 days | N: 5 | HRak, 95% CI  No muscle weakness  3.74, 1.13-12.4  No apraxia  10.7, 1.24-82  Occupation pre-injury  2.11, 1.17-3.81 | Stroke location | Return to work (1 month or more in active employment) |
| Saeki  2010  Japan | P | N: 325  N: 253 answered follow-up questionnaire  G: 264/61  A: 55.1, 7.4  I: First stroke | 18 months | N: 72 | OR, 95% CI  Function hemiplegic hand 4.66, 1.40-19.53  Independent  ADL BI  2.71, 1.08-7.03  Gender  3.24, 1.11-10.96 | Function  hemiplegic leg | RTW(active employment at former or new occupation (full-time/part-time competitive employment or self-employment) |
| Tanaka  2011  Japan | P | N: 335 selected  N: 254 analyzed  G: 267/68  A: 55.2, 7.2  I: First stroke | 1 month | N: 81 | OR, 95% CI  Occupation pre-injury  2.06, 1.00-4.21  ADL BI  1.02, 1.01-1.03  Employment status  17.36, 3.15-95.72  Dysfunction  Attention  0.35, 0.14-0.91  Memory  0.35, 0.14-0.89  Intelligence  0.32, 0.12-0.89 | Etiology  Mental stress at work | RTW (1 month after discharge) |
| Trygged  2011  Sweden | P | N: 11864 whole sample  N: 7081 analyzed  G: 4548/2533  A: 40-59  I: First stroke | 4 years | N: 4783 | RRal, 95% CI  Education high level  1.13, 1.04-1.22  Income  1.94, 1.77-2.12 | Gender | RTW (return to paid job, at least 6.600 €/year) |
| Waje-Andreassen 2013  Norway | PC | Patients  N: 232 inclusion  N: 198 first follow-up  N: 144 second follow-up  Fulltime work N: 61  G: 42/19  A: 51.6, 7.7  Part-time/no work N: 83  G: 40/43  A: 53.5, 8.7  I: ischemic stroke  Controls  N: 453 inclusion  N: 215 first follow-up  N: 167 second follow-up  Fulltime work N: 92  G: 61/32  A: 53.4, 7.1  Part-time/no work N: 75  G: 30/45  A: 55.7, 6.1 | 1998-2001  2004-2005  2012-01-01 | Patients  N: 34 Controls  N: 238  Patients  N: 54 Controls  N: 48 | OR, 95% CI, p  No memory problems  *0.18, 0.07-0.47, <0.001  Functional outcome  mRS  *0.02, 0.002-0.12, <0.001  Male gender  *0.24, 0.10-0.61, 0.002  *OR in article incorrect, reevaluation (personal communication with U. Waje-Andreassen) |  | Full-time work (versus part-time work or no work) |
| Wilz  2009  Germany | P | N: 70  G: 56/14  A: 52.4, 8.1, 30-65  I: First stroke | 1 year | N: 10 | OR, p  ADL PCRSam  1.21, 0.006 | PCRS cognition Gender  Income | RTW |

aP prospective

bR retrospective

cM/F male/female

dSD standard deviation

eTBI traumatic brain injury

fOR Odds Ratio

g95% CI 95% confidence intervals

hCT computerized tomography

iFIM COG Functional Independence Measure Cognitive

jFIM M Functional Independence Measure Motor

kCIQ Community Integration Questionnaire

lDRS Disability Rating Scale

mRTW return to work

nGCS Glasgow Coma Scale

oPTA post-traumatic amnesia

pLOS length of stay

qGOS-E Extended Glasgow outcome scale

rBNIS Barrow Neurological Institute Screen

sNRS Neurobehavioral Rating Scale

tSRT Selective Reminding

uWAIS Wechsler Adult Intelligence Scale

vDOTDictionary of Occupation Titles

wFAM Functional Assessment Measure

xADL activities of daily living

yBI Barthel Index

zFIM Functional Independence Measure

aaGOS Glasgow outcome scale

abIQR interquartile range coefficients

acDELRS-R98 Delirium Rating Scale Revised 98

adLOC loss of consciousness

aePC patient control

afmRS modified Rankin scale

agFAI Frenchay Activities Index

ahNIHSS National Institutes of Health Stroke Scale

aiTOAST Trial of Org 10172 in acute stroke treatment

ajSSS Scandinavian Stroke Scale

akHR Hazard ratio

alRR relative risk

amPCRS Patient Competency Rating Scale
